# Supplementary material for: Effects of Different Parts on the Chemical Composition, Silage Fermentation Profile, In Vitro and In Situ Digestibility of Paper Mulberry
Source: PubMed Central journal article supplement (PMC7914576; doi:10.3390/ani11020413), 2021-02-05
Supplement: animals-11-00413-s001.pdf [file animals-11-00413-s001.pdf]

Table S1 The components of the buffer solution for *in vitro* experiments

| Items <sup>1</sup>    | Contents (mL/L) |
|-----------------------|-----------------|
| Water                 | 474             |
| Microelement solution | 0.118           |
| Artificial saliva     | 237             |
| Macroelement solution | 237             |
| Resazurin solution    | 1.18            |
| Reductant solution    | 47.4            |

<sup>1</sup> 100 mL microelement solution contains: 13.2 g CaCl<sub>2</sub>•2H<sub>2</sub>O, 10.0 g MnCl<sub>2</sub>•4H<sub>2</sub>O, 1.0 g CoCl<sub>2</sub>•6H<sub>2</sub>O, 8 g FeCl<sub>2</sub>•6H<sub>2</sub>O; 100 mL Artificial saliva contains: 3.50 g NaHCO<sub>3</sub>, 0.40 g NH<sub>4</sub>HCO<sub>3</sub>; 100 mL Macroelement solution contains: 0.57 g Na<sub>2</sub>HPO<sub>4</sub>, 0.62 g KH<sub>2</sub>PO<sub>4</sub>, 0.06 g MgSO<sub>4</sub>•7H<sub>2</sub>O; 100 mL Resazurin solution solution contains: 10 g C<sub>12</sub>H<sub>7</sub>NO<sub>4</sub>; 100 mL Reductant solution contains: 625 mg Na<sub>2</sub>S•9H<sub>2</sub>O, 0.16 g NaOH.

Table S2 Ingredient and chemical composition of the basal diet fed fistulated cows during the *in vitro* experiment (DM basis)

| Ingredients        | Amount (g/kg DM) | Ingredients                  | Amount (g/kg DM) |
|--------------------|------------------|------------------------------|------------------|
| Whole corn silage  | 521              | Limestone                    | 4.87             |
| Alfalfa            | 69.31            | NaCl                         | 2.58             |
| Soybean meal       | 79.76            | MgCl <sub>2</sub>            | 0.87             |
| Corn               | 38.05            | Choline                      | 1.73             |
| Flaked corn        | 86.78            | Premix <sup>1</sup>          | 3.52             |
| Extrusion soybean  | 9.76             | Water                        | 86.82            |
| Soybean hull       | 23.14            | Total                        | 1000             |
| Cottonseed         | 29.05            | Nutrient levels <sup>2</sup> |                  |
| Fatty powder       | 8.73             | Dry matter (g/kg as-fed)     | 507              |
| Yeast culture      | 3.24             | OM (g/kg DM)                 | 921              |
| Detoxication agent | 0.52             | NEL (MJ/kg DM)               | 8.16             |
| NaHCO <sub>3</sub> | 6.43             | CP (g/kg DM)                 | 170              |
| KHCO <sub>3</sub>  | 3.20             | aNDF (g/kg DM)               | 310              |
| CaHPO <sub>4</sub> | 2.41             | ADF (g/kg DM)                | 203              |

<sup>1</sup> Premix provided the following per kg of the total mixed ration: Mn 6 000 mg, Fe 4 800 mg, Zn 9 000 mg, Cu 2 600 mg, I 120 mg, Se 80 mg, Co 70 mg, VA 130 000 IU, VD3 36 000 IU, VE 465 IU.

<sup>2</sup> NEL: net energy for lactation. NEL was a calculated value, while the other values were measured.
